# Supplementary material for: Tropospheric aerosols over the western North Atlantic Ocean during the winter and summer campaigns of ACTIVATE 2020: Life cycle, transport, and distribution
Source: Copernicus journal article supplement (doi:10.5194/egusphere-2024-1127), 2024-04-25
Supplement: Supplementary file 1 [file egusphere-2024-1127-supplement.pdf]

1

2 *Supplement*

3

4 **Tropospheric aerosols over the western North Atlantic Ocean**  
5 **during the winter and summer campaigns of ACTIVATE 2020:**  
6 **Life cycle, transport, and distribution**

7

8 Hongyu Liu<sup>1,2</sup>, Bo Zhang<sup>1,2</sup>, Richard H. Moore<sup>2</sup>, Luke D. Ziemba<sup>2</sup>, Richard A. Ferrare<sup>2</sup>, Hyundeok  
9 Choi<sup>1,\*</sup>, Armin Sorooshian<sup>3</sup>, David Painemal<sup>2,4</sup>, Hailong Wang<sup>5</sup>, Michael A. Shook<sup>2</sup>, Amy Jo  
10 Scarino<sup>2,4</sup>, Johnathan W. Hair<sup>2</sup>, Ewan C. Crosbie<sup>2,4</sup>, Marta A. Fenn<sup>2,4</sup>, Taylor J. Shingler<sup>2</sup>, Chris A.  
11 Hostetler<sup>2</sup>, Gao Chen<sup>2</sup>, Mary M. Kleb<sup>2</sup>, Gan Luo<sup>6</sup>, Fangqun Yu<sup>6</sup>, Jason L. Tackett<sup>2</sup>, Mark A.  
12 Vaughan<sup>2</sup>, Yongxiang Hu<sup>2</sup>, Glenn S. Diskin<sup>2</sup>, John B. Nowak<sup>2</sup>, Joshua P. DiGangi<sup>2</sup>, Yonghoon  
13 Choi<sup>2,4</sup>, Christoph A. Keller<sup>7,8</sup>, and Matthew Johnson<sup>9</sup>

14 <sup>1</sup>National Institute of Aerospace, Hampton, VA

15 <sup>2</sup>NASA Langley Research Center, Hampton, VA

16 <sup>3</sup>University of Arizona, Tucson, AZ

17 <sup>4</sup>Analytical Mechanics Associates, Hampton, VA

18 <sup>5</sup>Pacific Northwest National Laboratory, Richland, WA

19 <sup>6</sup>State University of New York at Albany, Albany, NY

20 <sup>7</sup>Morgan State University, Baltimore, MD

21 <sup>8</sup>NASA Goddard Space Flight Center, Greenbelt, MD

22 <sup>9</sup>NASA Ames Research Center, Moffett Field, CA

23 <sup>\*</sup>Now at SAIC / NOAA/NWS/NCEP/Environmental Modeling Center, College Park, MD

24

25 Correspondence to: Hongyu Liu (hongyu.liu-1@nasa.gov); Bo Zhang (bo.zhang@nasa.gov)

26

27 **Section S1: Model evaluation with surface aerosol concentrations, deposition fluxes, and MODIS AOD**

28

28 **observations**

29 In this section we evaluate model simulations with surface aerosol concentration observations from the  
30 IMPROVE and CSN networks, aerosol deposition flux measurements from the NTN network of NADP, and satellite  
31 AOD measurements from MODIS/Aqua, with a focus on the eastern U.S. coastal region or WNAO.

32 **Aerosol surface concentrations.** For comparison with model SNA surface concentrations, we use the  
33 IMPROVE/CSN observations obtained at 59 eastern U.S. sites (in the states of NY, CT, VA, MA, ME, GA, PA, DC,  
34 FL, NC, and SC), which are located upwind of the ACTIVATE flight area. **Fig. S1** shows the scatterplots of  
35 IMPROVE/CSN daily surface concentrations of SNA aerosols versus corresponding model results at each of the  
36 selected sites for Feb.-Mar. (upper panels) and Aug.-Sep. (lower panels), respectively, 2020. The model results from  
37 both “standard” (blue triangles and lines) and “fixedCWC” (red triangles and lines) experiments (also see **Table 1**)  
38 are shown to help understand the impact of using MERRA-2 CWC on simulated aerosols in GEOS-Chem. Model  
39 daily output was sampled at the day, location, and site elevation for each data sample. In Feb.-Mar., for sulfate the  
40 standard model with MERRA-2 CWC has a small overall bias (0.6%) relative to the observations, with a reduced-  
41 major-axis (RMA) regression slope of 0.80 and a correlation coefficient (R) value of 0.46. The fixedCWC simulation

42 yields a better regression slope (0.98) but a much larger overall bias. The standard model overestimates nitrate and  
43 ammonium substantially with an average positive bias of 198.5% and 230.3%, respectively. These biases in fixedCWC  
44 are even higher. Using MERRA-2 CWC in the stratiform precipitation scavenging in the standard model is expected  
45 to reduce existing large positive biases in surface nitrate and ammonium concentrations as demonstrated by Luo et al.  
46 (2019, 2020). Our results here also show that using spatiotemporally varying CWC from MERRA-2 slightly expedites  
47 aerosol scavenging and thus improves simulated aerosol concentrations. The improvement in our analysis is, however,  
48 very limited. In Aug.-Sep., the standard model largely overestimates surface concentrations of sulfate (61.2% bias),  
49 nitrate (97.4% bias), and ammonium (249.9% bias). Using MERRA-2 CWC has slightly reduced the model bias in  
50 surface sulfate concentrations but increased the model biases in surface nitrate and ammonium concentrations. The  
51 latter is inconsistent with Luo et al. (2020) probably due to not having fully implemented their modifications to sulfate  
52 scavenging, which affects nitrate and ammonium through the SNA aerosol chemical dynamics. This also suggests that  
53 the impact of individual modifications to SNA wet scavenging should be investigated separately because feedback  
54 from complicated chemical dynamics is always involved.

55 **Aerosol wet deposition fluxes.** For comparison with model SNA wet deposition fluxes, we use the NADP  
56 observations obtained at over 100 eastern U.S. sites (in the same states as for surface aerosol concentrations above).  
57 **Fig. S2** shows the scatterplots of model monthly mean wet deposition fluxes of sulfate + SO<sub>2</sub>, nitrate + nitric acid  
58 (HNO<sub>3</sub>), and ammonium + ammonia (NH<sub>3</sub>) versus those from NADP for Feb.-Mar. and Aug.-Sep. 2020. The observed  
59 sulfur deposition fluxes are mostly < 1.0 kg per ha per 30 days and did not change significantly from winter to summer.  
60 In both seasons, the standard model with MERRA-2 CWC overestimates sulfate wet deposition fluxes (~57.9% bias  
61 in winter and ~44.2% bias in summer), while the fixedCWC simulation results in reduced biases (~18.4% in winter  
62 and 31.8% in summer). Correlation between either of the two simulations and observations is not strong (R<0.5),  
63 suggesting that further improvement is required for sulfate scavenging. Observed wet deposition fluxes of nitrate tend  
64 to decrease from winter to summer, presumably because of lower concentrations in summer (**Fig. S1**). In the  
65 wintertime, both the standard and fixedCWC simulations overestimate nitrate deposition fluxes. The fact that model  
66 simulations show large positive biases in both surface concentrations and deposition fluxes suggests that there is too  
67 much nitrate mass in the model and/or nitrate is scavenged too fast at higher altitudes followed by partial release into  
68 the air due to rainwater evaporation close to the surface. Compared to the fixedCWC simulation, the standard  
69 simulation shows larger nitrate deposition flux overestimates due to faster scavenging with MERRA-2 CWC (Luo et  
70 al., 2019). The observed ammonium wet deposition fluxes exhibit larger variability among all sites in summer relative  
71 to winter. The fixedCWC simulation tends to underestimate ammonium deposition fluxes and shows values of similar  
72 magnitude in the two seasons. The standard simulation with MERRA-2 CWC overcorrects this underestimate in winter  
73 due to enhanced stratiform precipitation scavenging of ammonium, resulting in an overall positive bias of 46.1%. Such  
74 effects are not seen for summertime ammonium likely because of the increased role of convective scavenging in  
75 summer.

76 **MODIS AOD.** We compare model simulated AOD with MODIS observations with respect to the spatial  
77 distribution of monthly mean AODs along with speciated AODs suggested by the model. **Fig. S3** shows model  
78 monthly mean AODs in comparison with MODIS/Aqua retrievals (at 550 nm) over North America and the North

79 Atlantic for the months of Feb. and Mar., respectively, 2020. Model output is sampled daily at 1:30 pm local time  
80 along the Aqua satellite orbit track. Also shown are contributions to the total AOD in the model from accumulation  
81 mode sea salt (SSa), coarse mode sea salt (SSc), SNA, BC, organic carbon (OC), and dust. Model AODs in the  
82 simulation “fixedCWC” (**Table 1**) are shown in the bottom panels. In general, the model underestimates AODs over  
83 the WNAO during Feb.-Mar. 2020, with improved model performances along the south/east U.S. coast in March. The  
84 former is likely ascribed to underestimated sea salt emissions because of MERRA-2’s tendency to underestimate ocean  
85 surface winds (Carvalho, 2019) and coarse model grid resolution (Weng et al., 2020). The spatial variation of MODIS  
86 AOD from the Midwest U.S. to the WNAO shows different patterns between Feb. and Mar. In Feb., MODIS observed  
87 high AODs over the Midwest U.S., a decreasing trend towards the South/East U.S. Coast, and high AODs over the  
88 WNAO. The model captures this spatial pattern but the magnitude of AOD variations is much smaller than observed  
89 by MODIS. The spatial distribution of model simulated speciated AODs (**Fig. S3**) suggest that SNA aerosols over the  
90 Midwest U.S. and coarse-mode sea salt over the WNAO are mainly responsible for this pattern in Feb. In Mar., MODIS  
91 observed higher AODs in South/East U.S. Coast and over the WNAO compared to Feb. Such increases are also  
92 captured by the model, which attributes the higher AODs to substantially increased OC and, to a lesser extent, more  
93 SNA over the Midwest U.S. and coarse-mode sea salt over the WNAO. The low bias in AOD over the western U.S.  
94 in the model is likely due to missing anthropogenic or BB emissions for the region, as the “fixedCWC” simulation  
95 with slower wet scavenging does not remove this model bias. The latter simulation does yield higher AODs over the  
96 WNAO, closer to the MODIS values. However, this could be a result of compensating effects between inefficient  
97 aerosol wet scavenging and low sea salt emissions over the ocean. Model simulated AODs over the WNAO are  
98 dominated by coarse-mode sea salt, SNA, OC, and accumulation-mode sea salt, with negligible contributions from  
99 BC and dust.

100 **Fig. S4** shows the same plots as **Fig. S3**, but for the months of Aug. and Sep., respectively, 2020. In Aug., MODIS  
101 observed much higher AODs over the western, southwestern, southeastern U.S., and WNAO, relative to the winter  
102 months. The model reproduces the general spatial distribution but again underestimates AODs over the remote Atlantic  
103 Ocean. The distribution of model speciated AODs suggests that OC explains most of the AOD spatial variation while  
104 SNA also makes an important contribution. In September, MODIS observed even higher AODs over the western U.S.  
105 coast ( $> 0.5$ ), Midwest U.S., and WNAO. The model captures this month-to-month change in AODs very well and  
106 attributes it to large increases in OC as well as coarse-mode sea salt aerosols. As expected, SNA AOD decreases from  
107 Aug. to Sep., reflecting the seasonal reduction in secondary production of SNA aerosols. In summer 2020, extensive  
108 wildfires occurred in the western and southeastern U.S. (section 5.4). In particular, the August Complex “Gigafire” in  
109 mid-August 2020 and the California Creek fire in early September 2020 are among the most intensive fire events in  
110 California. Primary organic aerosols and SOA from oxidation of VOCs emitted by these fires cause substantial  
111 increases in AOD over both the fire emission source region and along the smoke transport pathway towards the  
112 Midwest, northeast U.S., and WNAO, as observed by MODIS and simulated by the model. The generally much higher  
113 AODs in summer relative to winter are mainly due to the much larger contributions from these smoke organic aerosols.  
114 The model AOD low bias over the WNAO in Aug. appears to be at least partly due to underestimate of sea salt  
115 emissions, which are lower than those for Feb., Mar., and Sep. In addition, BC from the wildfires makes non-negligible

116 contributions to summertime AOD over the western and Midwest U.S., in contrast to the wintertime. Model dust AOD  
117 distributions indicate transport of dust from tropical eastern Atlantic and North Africa to the WNAO region during the  
118 summer months, especially Aug. 2020, in agreement with MODIS AOD observations. Using MERRA-2 CWC for  
119 stratiform precipitation scavenging of aerosol in the standard model has little effects on model simulated AOD in  
120 Aug.-Sep., when compared to those from the “fixedCWC” simulation (bottom panels, **Fig. S4**). This is due to the  
121 dominant role of convective (versus stratiform) precipitation in scavenging aerosols during summer.

122

## 123 **References**

124

125 Carvalho, D.: An Assessment of NASA’s GMAO MERRA-2 Reanalysis Surface Winds, *J. Climate*, 32(23), 8261–  
126 8281, doi:10.1175/JCLI-D-19-0199.1, 2019.

127 Philip, S, Marin, R. V., Pierce, J. R., Jimenez, J. L., Zhang, Q., Canagaratna, M. R., Spracklen, D. V., Nowlan, C. R.,  
128 Lamsal, L. N., Cooper, M. J., and Krotkov, N. A., Spatially and seasonally resolved estimate of the ratio of organic  
129 mass to organic carbon, *Atmos. Environ.*, 87, 34-40, <http://dx.doi.org/10.1016/j.atmosenv.2013.11.065>, 2014.

130 Weng, H.-J., Lin, J.-T. \*, Martin, R., Millet, D. B., Jaeglé, L., Ridley, D., Keller, C., Li, C., Du, M.-X., and Meng, J.,  
131 Global high-resolution emissions of soil NO<sub>x</sub>, sea salt aerosols, and biogenic volatile organic compounds,  
132 *Scientific Data*, 7, 148, doi:10.1038/s41597-020-0488-5, 2020.

133

134  
135  
136

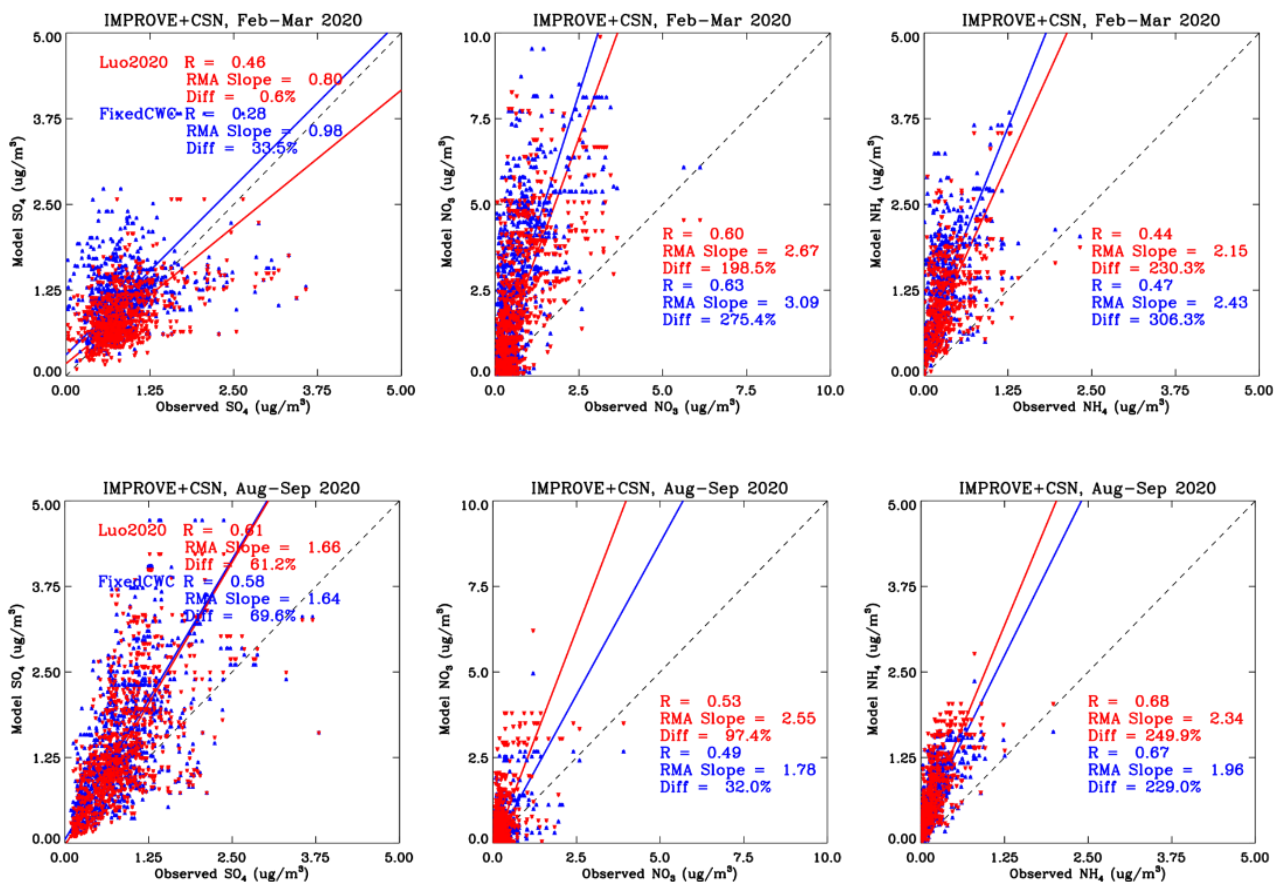

137

138

139 **Figure S1.** Scatterplots of model daily mean surface concentrations of SO<sub>4</sub>, NO<sub>3</sub>, and NH<sub>4</sub> versus corresponding IMPROVE and  
140 CSN observations made at near-coast eastern U.S. sites during Feb.-Mar. (upper panels) and Aug.-Sep. (lower panels) 2020,  
141 respectively. Model results from simulations with either a fixed cloud water content (blue; Table 1) or MERRA-2 cloud water  
142 content (red; Table 1) are shown. Solid lines are the linear regression lines obtained using the reduced-major-axis (RMA)  
143 method. Dashed lines are 1:1 line. Legends show calculated correlation coefficient, RMA slope (if R > 0.1), and overall difference (%)  
144 between model results and observations, i.e.,  $(\sum \text{model} - \sum \text{observation}) / \sum \text{observation} \times 100\%$ .

145

146  
147  
148

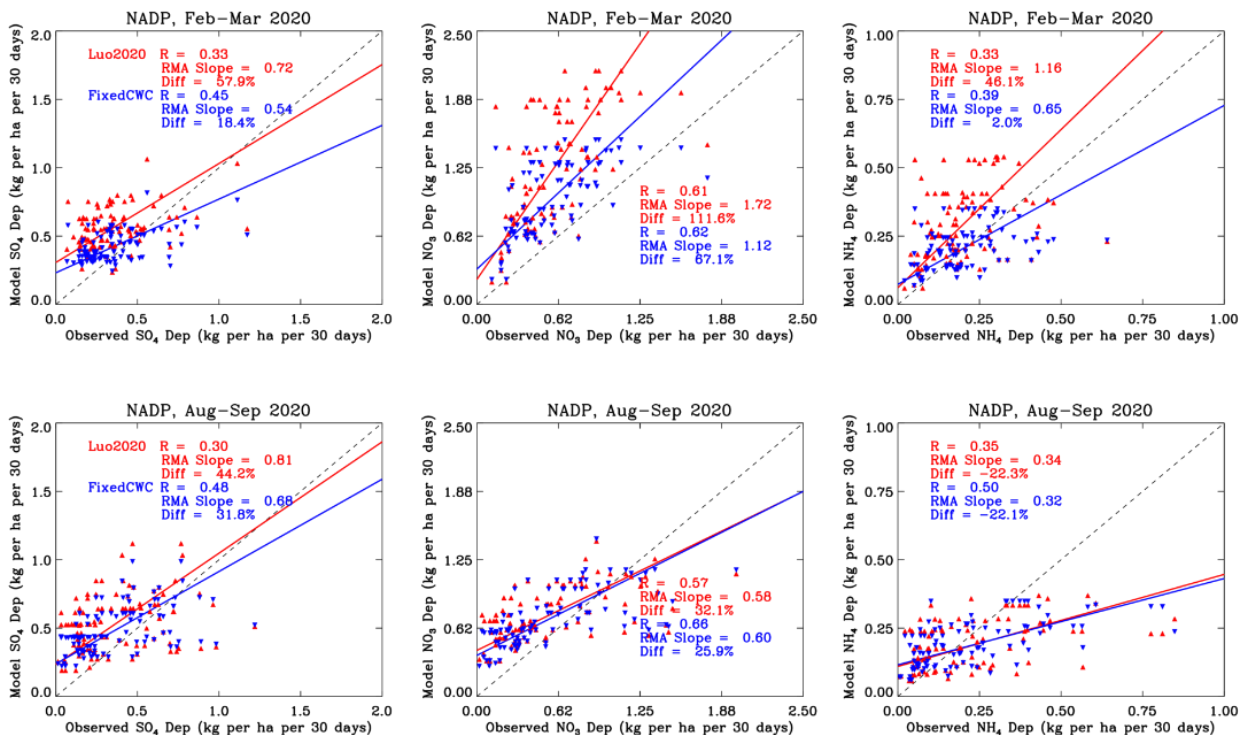

149

150

151 **Figure S2.** Scatterplots of model monthly mean wet deposition fluxes of SO<sub>4</sub>+SO<sub>2</sub>, NO<sub>3</sub>+HNO<sub>3</sub>, and NH<sub>4</sub>+NH<sub>3</sub> versus  
152 corresponding NADP observations made at near-coast eastern U.S. sites (>100 sites in the states of NY, CT, VA, MA, ME, GA,  
153 PA, DC, FL, NC, and SC) during Feb.-Mar. (upper panels) and Aug.-Sep. (lower panels) 2020, respectively. Deposition mass fluxes  
154 of SO<sub>2</sub>, HNO<sub>3</sub>, and NH<sub>3</sub> are converted to SO<sub>4</sub>, NO<sub>3</sub>, and NH<sub>3</sub> mass fluxes of equivalent mole amounts. Monthly mean model results  
155 are sampled at the month and location of observations. Each data point in the figure represents a monthly mean value for one single  
156 site. Model results from simulations with either a fixed cloud water content (blue; Table 1) or MERRA-2 cloud water content (red;  
157 Table 1) are shown. Solid lines are the linear regression lines obtained using the reduced-major-axis (RMA) method. Dashed lines  
158 are 1:1 line. Legends show calculated correlation coefficient, RMA slope (if R > 0.1), and overall difference (%) between model  
159 results and observations:  $(\sum_{model} - \sum_{observation}) / \sum_{observation} \times 100\%$ .

160

161  
 162  
 163  
 164  
 165  
 166  
 167  
 168  
 169  
 170  
 171  
 172  
 173  
 174  
 175  
 176  
 177  
 178  
 179  
 180  
 181  
 182  
 183  
 184  
 185

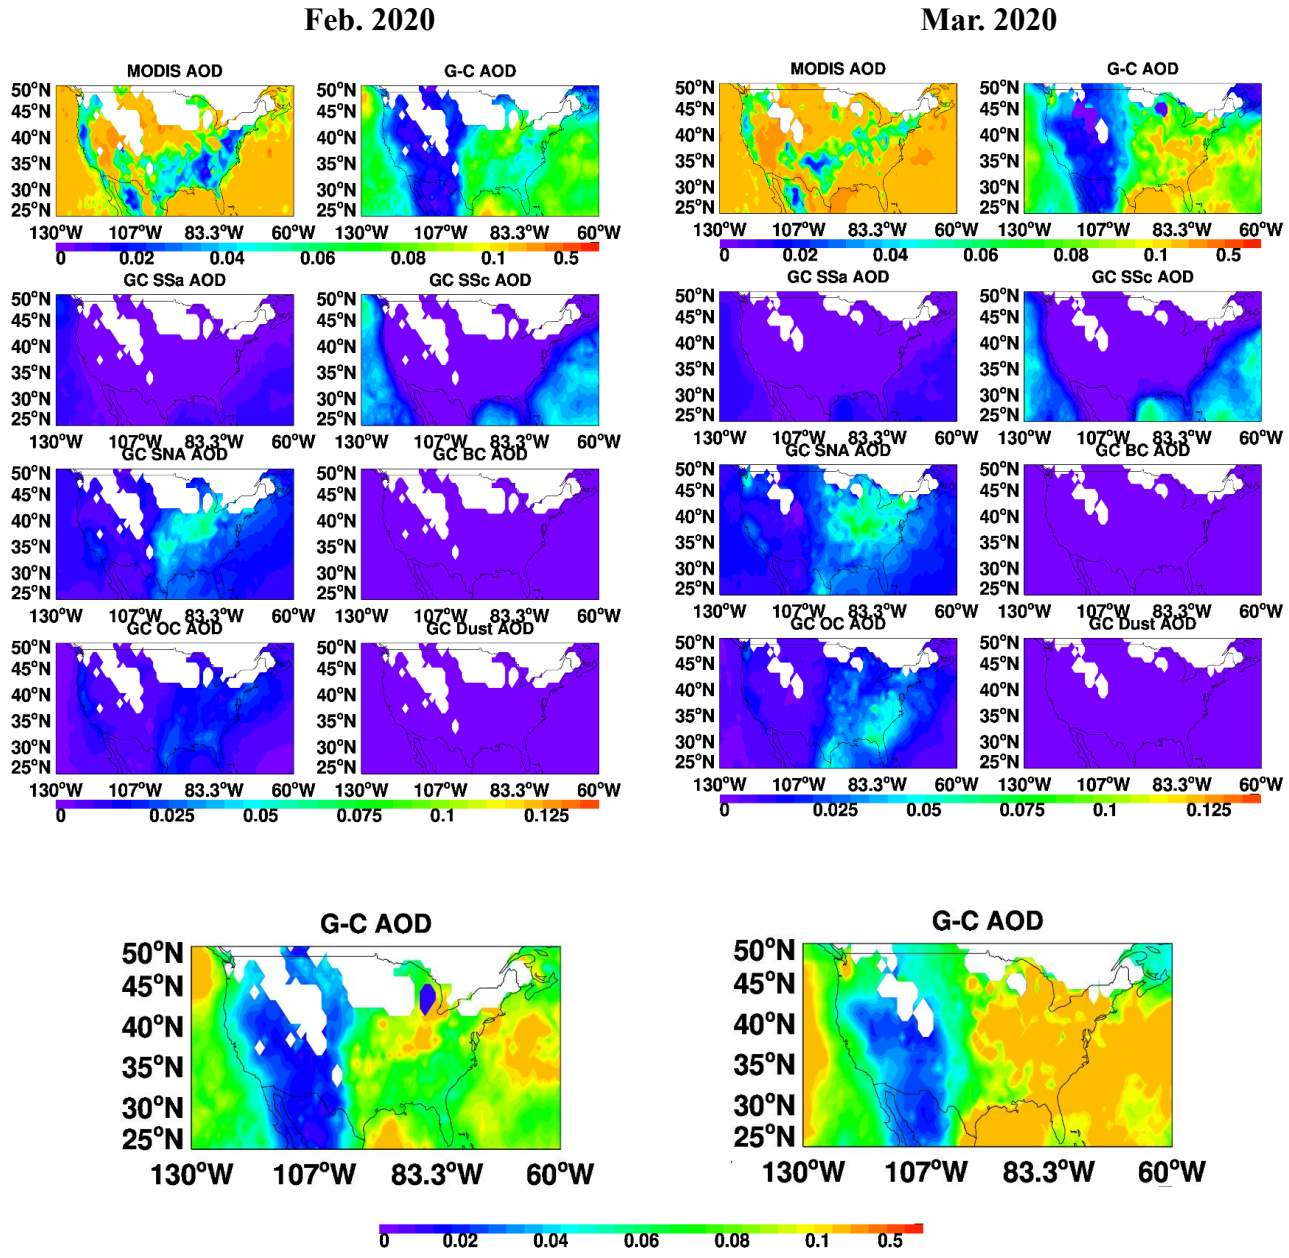

186 **Figure S3.** Evaluation of model monthly mean AODs with MODIS/Aqua retrievals (at 550nm) over North America and North  
 187 Atlantic for Feb. 2020 (left two columns) and Mar. 2020 (right two columns). Model output is sampled daily at 1:30 pm local time  
 188 along the Aqua satellite orbit track. Also shown are contributions to the total AOD in the model from accumulation mode sea salt  
 189 (SSa), coarse mode sea salt (SSc), sulfate-nitrate-ammonium (SNA), black carbon (BC), organic carbon (OC, primary only), and  
 190 dust. Model AODs in the simulation “fixedCWC” (Table 1) are shown in the bottom panels.

191

192  
 193  
 194  
 195  
 196  
 197  
 198  
 199  
 200  
 201  
 202  
 203  
 204  
 205  
 206  
 207  
 208  
 209  
 210  
 211  
 212  
 213  
 214  
 215  
 216  
 217  
 218

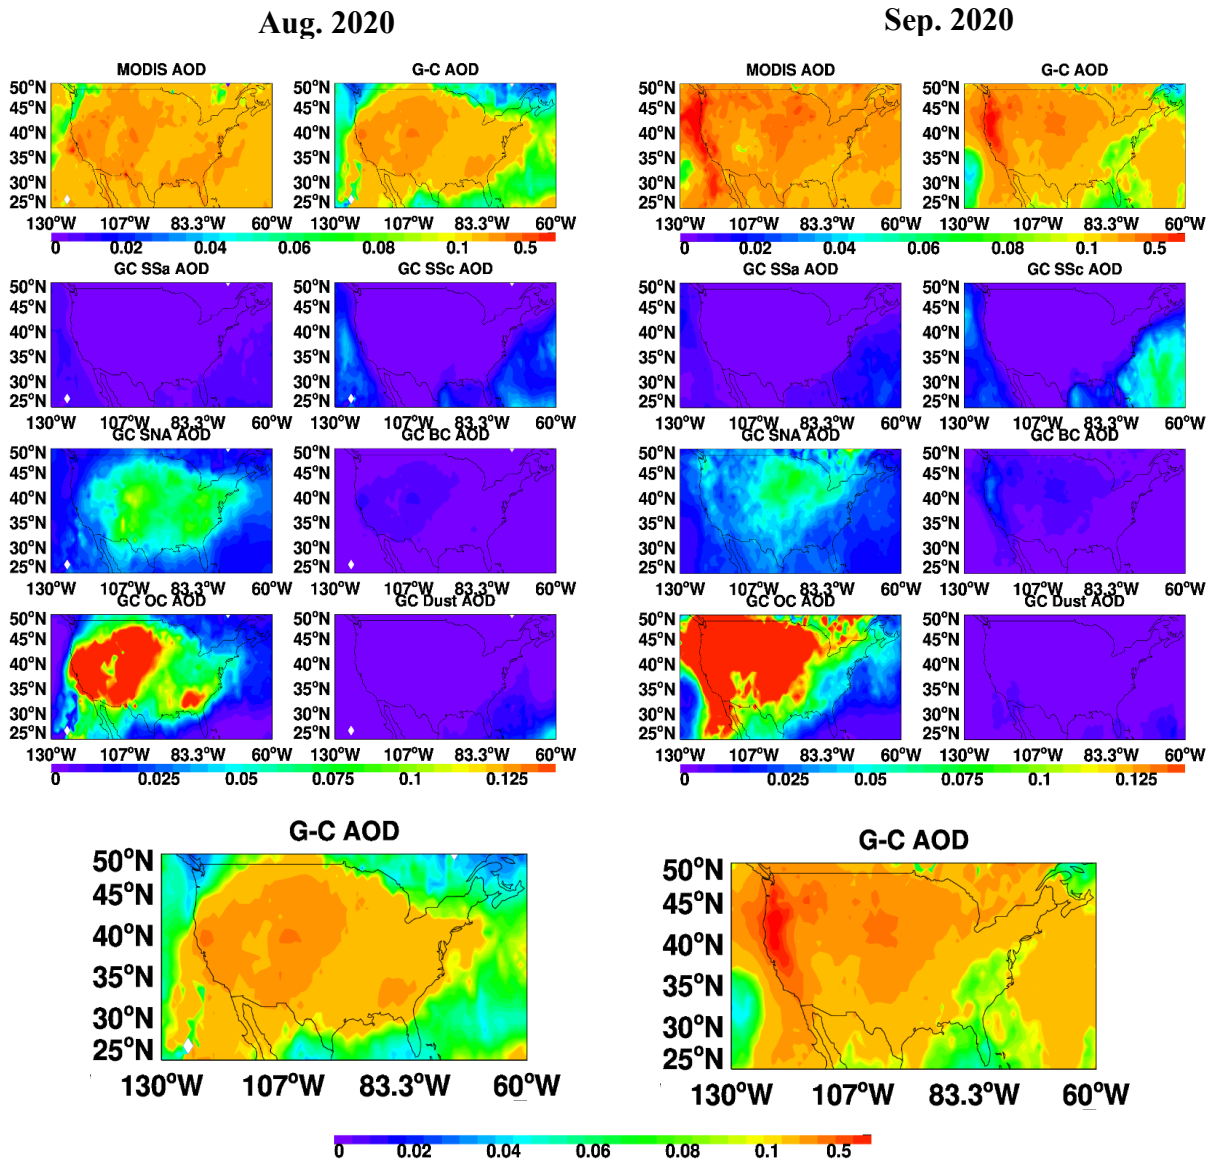

Figure S4. Same as Fig. S3, but for Aug. 2020 (left two columns) and Sep. 2020 (right two columns).



219  
220  
221  
222  
223  
224  
225  
226  
227  
228  
229  
230  
231  
232  
233  
234  
235  
236

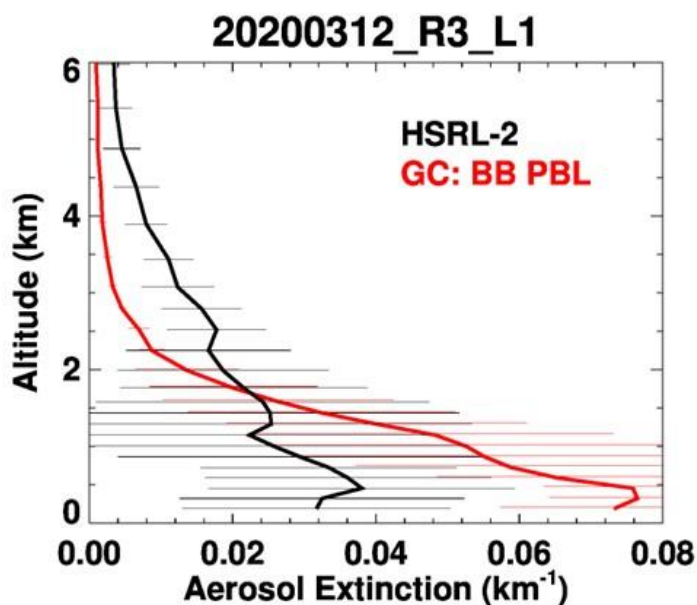

**Figure S5.** Comparisons of model aerosol extinctions (550nm) with aircraft HSRL-2 lidar measurements (532nm) averaged over the morning flight on March 12, 2020. Biomass burning emissions are injected into the planetary boundary layer (“BB PBL”) in the model (see Table 1). Hourly model output was sampled at the time and location of lidar measurements. Horizontal lines denote +/- standard deviations of observed and simulated aerosol extinctions at model vertical levels.

237

238

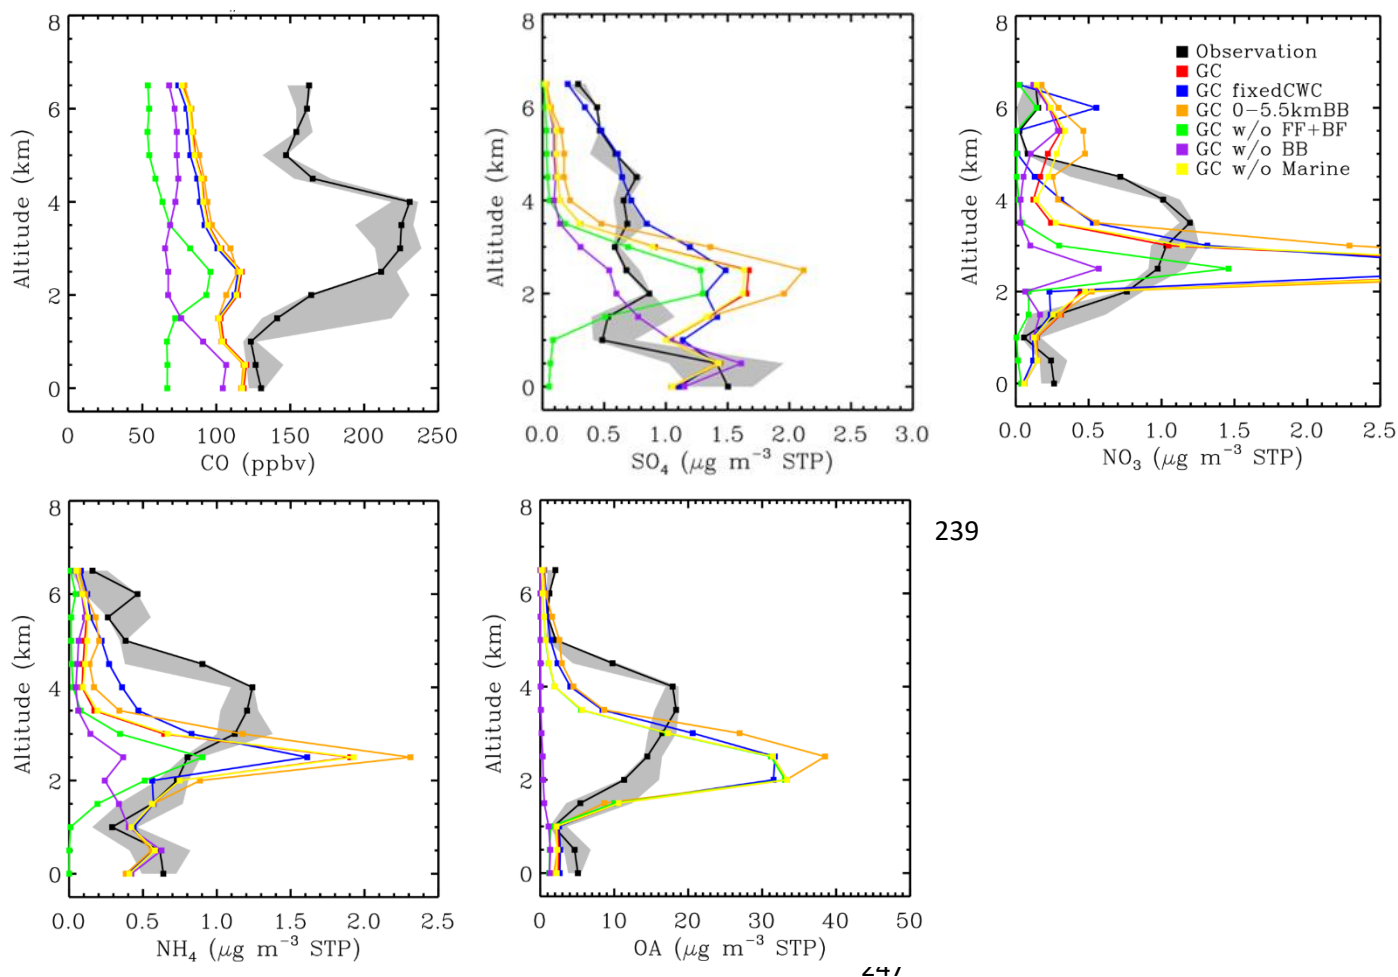

239

248

249 **Figure S6.** Comparison of model simulated (red) vertical profiles of CO (ppbv), sulfate, nitrate, ammonium, and organic aerosol  
250 (OA;  $\mu\text{g m}^{-3}$  STP) mixing ratios with Falcon aircraft measurements (black) on Sep. 23, 2020. Also shown are model results from  
251 simulations (Table 1) with (1) a fixed value for cloud water content used in aerosol scavenging (“fixedCWC”), (2) biomass burning  
252 emissions injected to the 0-5.5km altitudes, (3) fossil fuel and biofuel emissions turned off, (4) biomass burning emissions turned  
253 off, or (5) marine emissions turned off, respectively. An OA/OC ratio of 2.1 (Philip et al., 2014) is used to convert simulated OC  
254 to compare with AMS OA measurements. Hourly model output was sampled at the time and location of aircraft measurements.  
255 Values (500m-binned) are medians. Gray shaded areas indicate the ranges of 25<sup>th</sup> – 75<sup>th</sup> percentiles for the observations.

256
